# Supplementary material
Source: Springer Nature journal article supplement (https://www.springermedizin.de/resource/supplementary/12885_2008_1277_MOESM10_ESM.pdf/9471622)
Supplement: MOESM10 [file 9471622]

Additional file 10

File format: DOC

Title: Correlation between the Ki-67 LI and the MS and the Ki-67 mRNA level

Description: (a) Correlation of Ki-67 LI with MS, (b) Correlation of Ki-67 LI with Ki-67 mRNA level

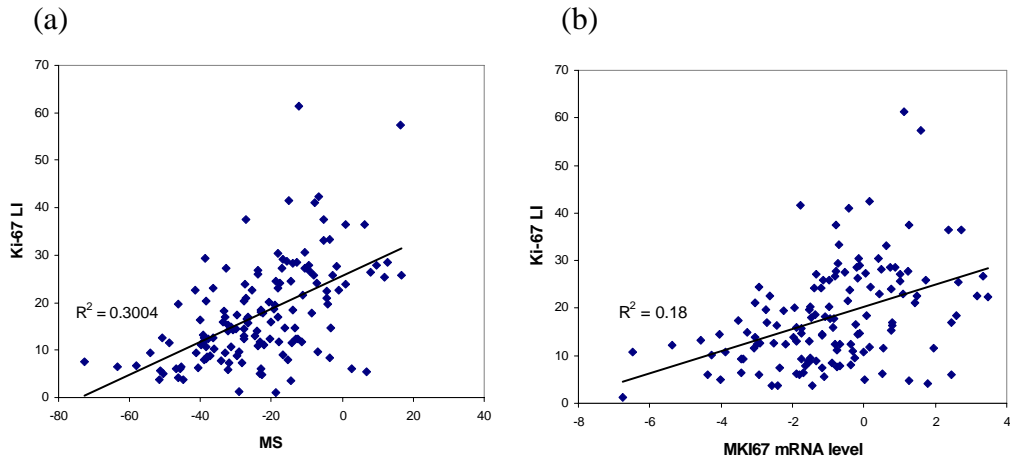

$R^2 = 0.30$  and  $0.18$ , were observed for Ki-67 LI versus MS, and Ki-67 LI versus Ki-67 mRNA level, respectively.
